# Supplementary material for: Isolation, Propagation and Genotyping of Human Rotaviruses Circulating among Children with Gastroenteritis in Two Egyptian University Hospitals
Source: MDPI journal article supplement (doi:10.3390/biology11101413), 2022-09-28
Supplement: s1 [file s1]

**Table S1.** PCR conditions for detection of VP6- rotavirus fragment

| Steps             | cDNA   | One step RT-PCR reaction        |                                 |               |                |                 |          |
|-------------------|--------|---------------------------------|---------------------------------|---------------|----------------|-----------------|----------|
|                   |        | 1 <sup>st</sup><br>Denaturation | 2 <sup>nd</sup><br>Denaturation | Annealin<br>g | Elongatio<br>n | Terminatio<br>n | Hol<br>d |
| Temperature<br>°C | 45     | 94                              | 94                              | 55            | 72             | 72              | 4        |
| Time              | 30 min | 5 min                           | 30 sec                          | 45 sec        | 60 sec         | 5 min           | ∞        |
| No. of Cycles     | 1      | 1                               |                                 | 35            |                | 1               |          |

**Table S2.** The primer set used for VP7 fragment G-genotyping

| Gene            | Primer    | Primer sequence (5′ → 3′)    | G-Genotype | References |
|-----------------|-----------|------------------------------|------------|------------|
| First PCR       |           |                              |            |            |
| VP7 (Segment 9) | Beg9      | GGCTTTAAAAGAGAGAATTTCCGTCTGG |            | [32]       |
|                 | End9      | GGTACACATCATACAATTCTAATCTAAG |            |            |
| Second PCR      |           |                              |            |            |
|                 | End9      | GGTACACATCATACAATTCTAATCTAAG |            |            |
|                 | aAT8-69M  | GTCACACCATTGTGAAATTCG        | G8         |            |
|                 | aBT1-Wa   | CAAGTACTCAAATCAATGATGG       | G1         |            |
|                 | aCT2-DS-1 | CAATGATATTAACACATTTTCTGTG    | G2         |            |
|                 | aDT4-ST-3 | CGTTTCTGGTGAGGAGTTG          | G4         | [32]       |
|                 | aET3-P    | CGTTTGAAGAAGTTGCAACAG        | G3         |            |
|                 | aFT9W161  | CTAGATGTAACACTACAACACTAC     | G9         |            |
|                 | G10       | ATGTCAGACTACARATACTGG        | G10        |            |
|                 | G12       | CCGATGGACGTAACGTTGTA         | G12        |            |

**Table S3.** The primer set used for VP4 (P) genotyping

| Gene            | Primer  | Primer sequence (5' → 3') | P-Genotype | References |
|-----------------|---------|---------------------------|------------|------------|
| First PCR       |         |                           |            |            |
| VP4 (Segment 4) | Con2    | ATTTCGGACCATTTATAACC      |            | [33]       |
|                 | Con3    | TGGCTTCGCTCATTATAGACA     |            |            |
| Second PCR      |         |                           |            |            |
|                 | Con3    | TGGCTTCGCTCATTATAGACA     |            |            |
|                 | 1-TI-KU | ACTTGGATAACGTGC           | P[8]       |            |
|                 | 2T-1    | CTATTGTTAGAGGTTAGAGTC     | P[4]       |            |
|                 | 3T-1    | TGTTGATTAGTTGGATTCAA      | P[6]       | [33]       |
|                 | 4T-1    | TGAGACATGCAATTGGAC        | P[9]       |            |
|                 | 5T-1    | ATCATAGTTAGTAGTCGG        | P[10]      |            |

**Table S4.** Interpretation of human rotavirus genotyping [32,33,34]

| G-types   | Amplicon size (bp) | P-types   | Amplicon size (bp) |
|-----------|--------------------|-----------|--------------------|
| Beg9/End9 | 1062               | Con2/Con3 | 868                |
| G1        | 749                | P[4]      | 483                |
| G2        | 625                | P[6]      | 267                |
| G3        | 374                | P[8]      | 345                |
| G4        | 583                | P[9]      | 391                |
| G8        | 885                | P[10]     | 594                |
| G9        | 306                |           |                    |
| G10       | 397                |           |                    |
| G12       | 512                |           |                    |

## Appendix

**A1.** Molecular typing of positive samples using VP7 and VP4 segments experimental details.

In the first run, 5  $\mu$ l of previously isolated RNA was combined with 1  $\mu$ l of each VP7 specific primer pairs (Beg9/End9). To denature the dsRNA, the mixture was heated at 70°C for 5 minutes before being chilled in an ice bath for 2 minutes. The RT-PCR reactions were then carried out in two phases. In the first phase, reverse transcription was done on denatured dsRNA using the cDNA Synthesis Kit for RT-PCR (Catalog number: 30110750) (iNtRON Biotechnology, Korea). The cDNA yield was amplified in the second phase using FastStart<sup>TM</sup> PCR Master (Merck, Germany). Agarose gel electrophoresis (1.5%) was used to separate the amplicons. A second PCR run was performed to determine the genotype of the isolated rotavirus strains using the reverse primer and a cocktail of primers. In brief, 1  $\mu$ l of the first-round amplicons were mixed with 40  $\mu$ l of PCR-Master and 1  $\mu$ l of each of the End9 and G genotype-specific primers (Supplementary Table S2). In the second run, the same PCR conditions as previously mentioned were utilized. The amplicons were separated using 1.5% agarose gel electrophoresis, and the genotype was determined based on the product size [34]. Same techniques and settings, that were used to detect G genotypes, were used to detect P genotypes, but this time a VP4 specific primer pairs (Con2/ Con3) was used as terminal primers in the first amplification round and Con3 as well as a cocktail of P genotype-specific primers in the second one (Supplementary Table S3).
